# Supplementary material for: Sero-monitoring of health care workers reveals complex relationships between common coronavirus antibodies and SARS-CoV-2 severity
Source: PubMed Central journal article supplement — medRxiv. 2021 Apr 19:2021.04.12.21255324. Preprint. [Version 1] doi: 10.1101/2021.04.12.21255324 (PMC8077588; doi:10.1101/2021.04.12.21255324), 2021-04-19
Supplement: NIHPP2021.04.12.21255324-supplement-1.pdf [file NIHPP2021.04.12.21255324-supplement-1.pdf]

**Supplemental Figure.** Correlation between pre-existing antibody concentrations and reported COVID-19-related symptoms in symptomatic (n=64) and asymptomatic (n=4) health care workers with a PCR-confirmed SARS-CoV-2 infection. Significant p-values (<0.05) are indicated above the graph (one-way ANOVA using log<sub>2</sub>-transformed antibody concentrations). Horizontal lines show the geometric mean concentrations and 95% confidence intervals. \* p<0.05.

**Difficulty breathing**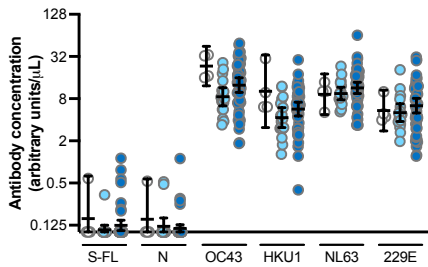**Fever**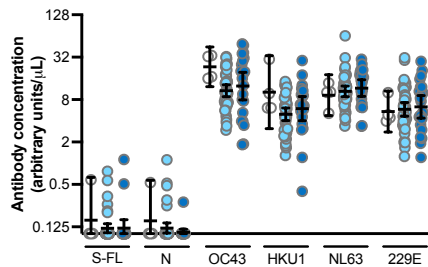**Fatigue/ness**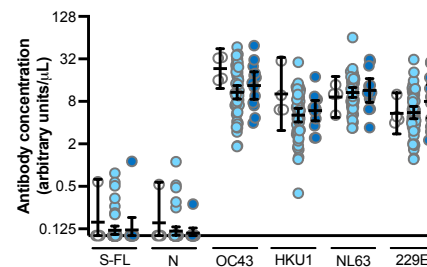**Loss of taste/smell**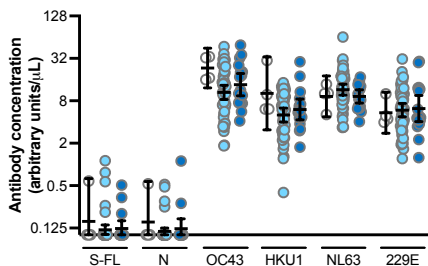**Cough**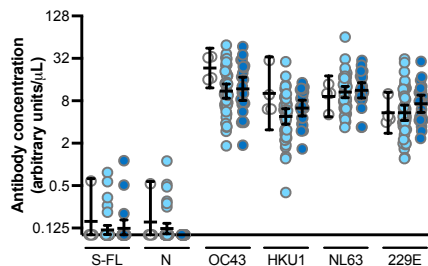**Nausea/vomiting**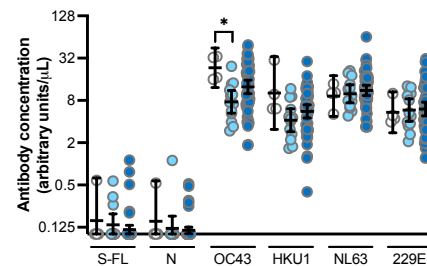**Diarrhea**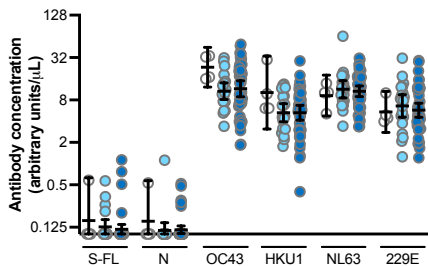**Loss of appetite**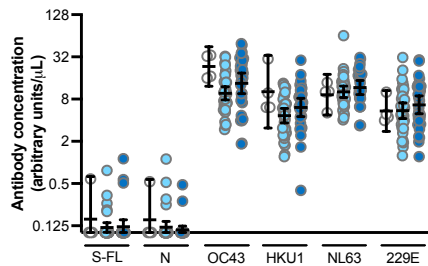**Muscle/body aches**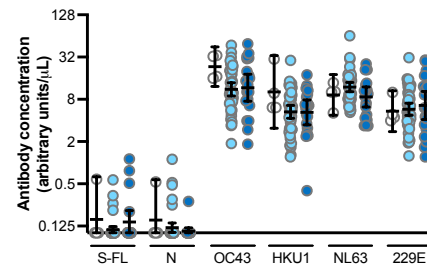

○ No symptoms      ● Other symptoms  
 ● Symptom highlighted in the graph

**Supplemental Table 1.** Participant characteristics.

|                                 | Total<br>(N=2043) | Seropositive<br>(N=55) | Seronegative<br>(N=1988) | P-value |
|---------------------------------|-------------------|------------------------|--------------------------|---------|
| Age (in years),<br>median (IQR) | 36 (30-46)*       | 34 (29-44)             | 36 (30-46)*              | 0.293   |
| Sex, n (%)                      |                   |                        |                          | 0.719   |
| Male                            | 502 (24.6)        | 17 (30.9)              | 485 (24.4)               |         |
| Female                          | 1536 (75.2)       | 38 (69.1)              | 1498 (75.4)              |         |
| Other                           | 2 (0.1)           | 0                      | 2 (0.1)                  |         |
| Unknown                         | 3 (0.1)           | 0                      | 3 (0.2)                  |         |
| Race, n (%)                     |                   |                        |                          | 0.291   |
| Asian                           | 172 (8.4)         | 2 (3.6)                | 170 (8.6)                |         |
| Black                           | 117 (5.7)         | 5 (9.1)                | 112 (5.6)                |         |
| White                           | 1694 (82.9)       | 45 (81.8)              | 1649 (82.9)              |         |
| Other/multiracial               | 33 (1.6)          | 1 (1.8)                | 32 (1.6)                 |         |
| Unknown                         | 27 (1.3)          | 2 (3.6)                | 25 (1.3)                 |         |
| Ethnicity, n (%)                |                   |                        |                          | 0.293   |
| Hispanic                        | 71 (3.5)          | 4 (7.3)                | 67 (3.4)                 |         |
| Non-Hispanic                    | 1971 (96.5)       | 51 (92.7)              | 1920 (96.6)              |         |
| Unknown                         | 1 (<0.1)          | 0                      | 1 (0.1)                  |         |

\* Age was not reported for 1 participant.

**Supplemental Table 2.** Characteristics of 64 participants who had no detectable S-RBD antibodies during the spring and summer of 2020 and reported via the online survey that they had a symptomatic lab-confirmed SARS-CoV-2 infection after the last blood draw.

|                                                      | <b>Total (N=64)</b> |
|------------------------------------------------------|---------------------|
| <b>Symptoms, n (%)</b>                               |                     |
| Cough                                                | 42 (65.6)           |
| Fever or chills                                      | 42 (65.6)           |
| Nausea/vomiting                                      | 13 (20.3)           |
| Diarrhea                                             | 20 (31.3)           |
| Unusual fatigue                                      | 51 (79.7)           |
| Loss of taste or smell                               | 47 (73.4)           |
| Difficulty breathing                                 | 17 (26.6)           |
| Loss of appetite                                     | 34 (53.1)           |
| Muscle/body aches                                    | 45 (70.3)           |
| Other                                                | 23 (35.9)           |
| <b>Estimated date of SARS-CoV-2 infection, n (%)</b> |                     |
| July 2020                                            | 6 (9.4)             |
| August 2020                                          | 1 (1.6)             |
| September 2020                                       | 0                   |
| October 2020                                         | 9 (14.1)            |
| November 2020                                        | 14 (21.9)           |
| December 2020                                        | 30 (46.9)           |
| January 2021                                         | 4 (6.3)             |
| <b>Resolution of symptoms, n (%)</b>                 |                     |
| Within 7 days                                        | 13 (20.3)           |
| Within 1 month                                       | 32 (50.0)           |
| More than 1 month                                    | 13 (20.3)           |
| Unknown                                              | 6 (9.4)             |
| <b>Hospitalization because of COVID-19, n (%)</b>    | <b>2 (3.1)</b>      |

**Supplemental Table 3.** Effects of log<sub>2</sub> pre-existing antibody titers, age and sex on symptom duration (days) via multivariate regression.

|            | <b>Estimate</b> | <b>SE</b> | <b>P-value</b> |
|------------|-----------------|-----------|----------------|
| S-FL       | -2.731          | 2.685     | 0.313          |
| Age        | 3.204           | 2.697     | 0.240          |
| Sex (male) | 5.675           | 7.964     | 0.479          |
| N          | 1.895           | 2.698     | 0.485          |
| Age        | 3.606           | 2.712     | 0.189          |
| Sex (male) | 6.299           | 7.997     | 0.434          |
| OC43       | -8.166          | 2.739     | 0.004          |
| Age        | 0.170           | 2.752     | 0.951          |
| Sex (male) | 4.226           | 7.498     | 0.575          |
| HKU1       | -5.867          | 2.630     | 0.030          |
| Age        | 2.392           | 2.644     | 0.369          |
| Sex (male) | 5.559           | 7.704     | 0.474          |
| NL63       | -2.354          | 2.683     | 0.384          |
| Age        | 3.548           | 2.697     | 0.194          |
| Sex (male) | 6.218           | 7.973     | 0.439          |
| 229E       | -3.054          | 2.846     | 0.288          |
| Age        | 2.840           | 2.742     | 0.305          |
| Sex (male) | 8.483           | 8.255     | 0.308          |
